# Supplementary material for: Variation in genetic admixture and population structure among Latinos: the Los Angeles Latino eye study (LALES)
Source: PubMed Central journal article supplement (PMC3087512; doi:10.1186/1471-2156-10-71), 2009-11-10

### LALES Latinos

Mean (s.d.) T = 0.5

Median (1<sup>st</sup> : 3<sup>rd</sup> quartile) T = 0.47 (-0.18 : 1.15)

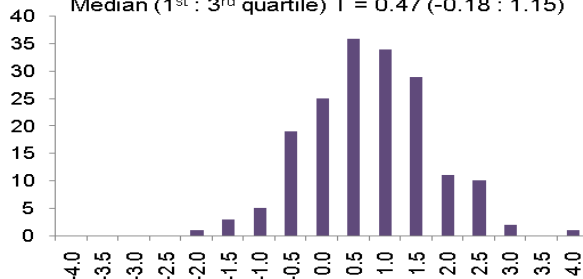

### Los Angeles Latinos

Mean (s.d.) T = 0.33 (1.00)

Median (1<sup>st</sup> : 3<sup>rd</sup> quartile) T = 0.24 (-0.42 : 0.99)

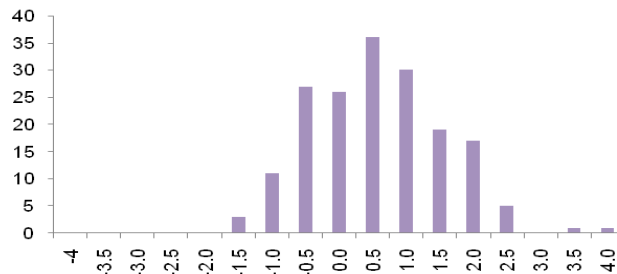

### Europeans

Mean (s.d.) T = 0.02 (0.99)

Median (1<sup>st</sup> : 3<sup>rd</sup> quartile) T = -0.20 (-0.63 : 0.48)

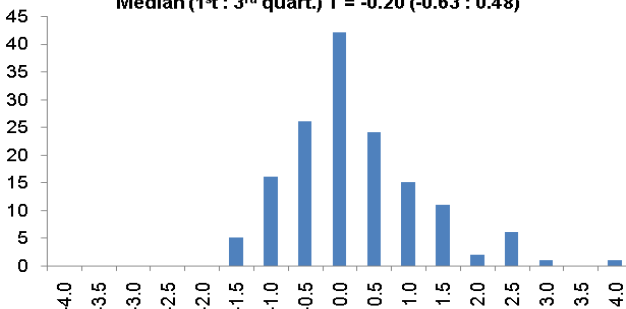

### Asians

Mean (s.d.) T = 0.02 (1.01)

Median (1<sup>st</sup> : 3<sup>rd</sup> quartile) T = -0.06 (-0.58 : 0.63)

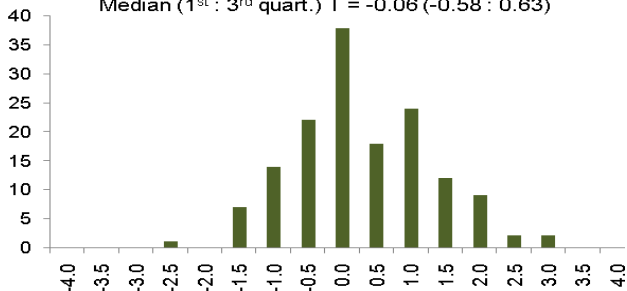

### African Americans

Mean (s.d.) T = 0.25 (0.99)

Median (1<sup>st</sup> : 3<sup>rd</sup> quartile) T = 0.29 (-0.47 : 0.86)

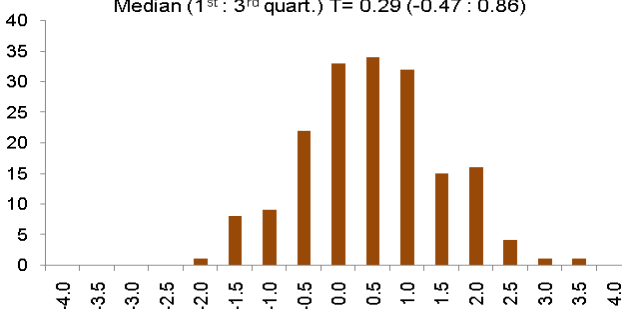

### Native Americans

Mean (s.d.) T = 0.2 (1.25)

Median (1<sup>st</sup> : 3<sup>rd</sup> quartile) T = -1.9 (-0.61 : 0.74)

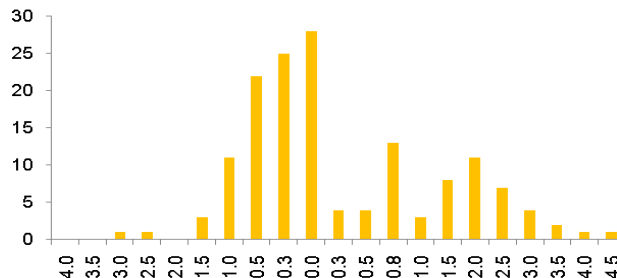

Supplement: 1471-2156-10-71-S2.pdf [file 1471-2156-10-71-S2.pdf]
