# Supplementary material for: Variation in genetic admixture and population structure among Latinos: the Los Angeles Latino eye study (LALES)
Source: PubMed Central journal article supplement (PMC3087512; doi:10.1186/1471-2156-10-71), 2009-11-10

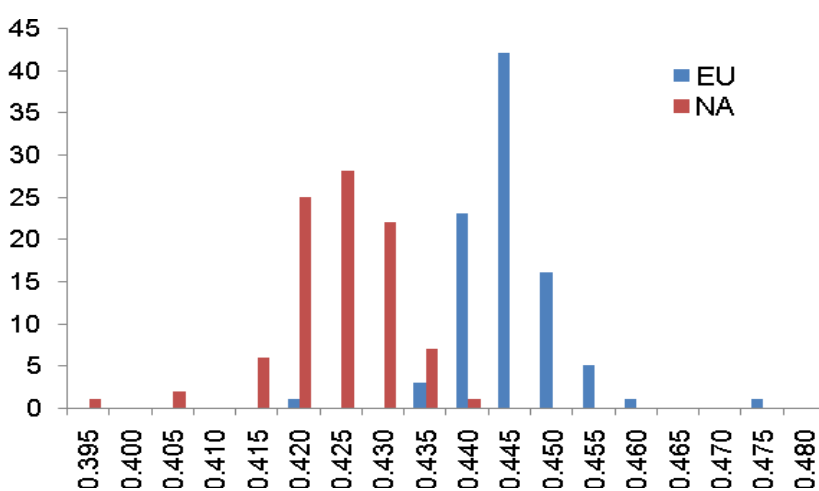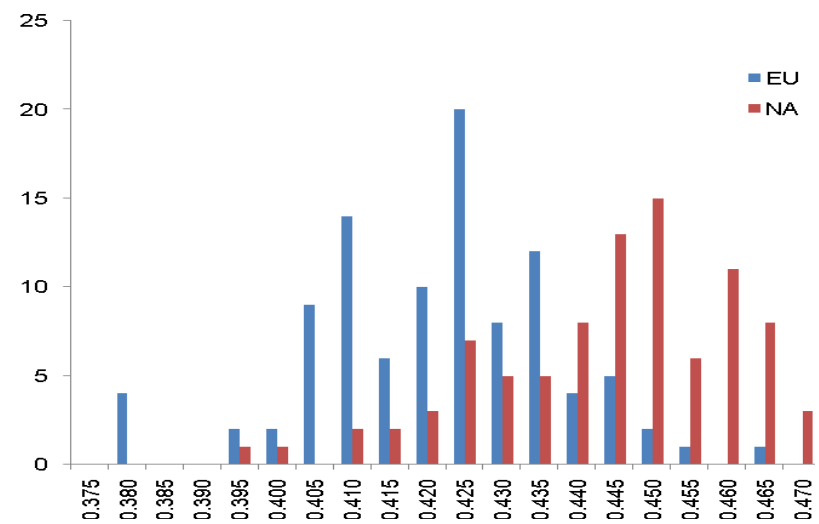

Supplement: 1471-2156-10-71-S4.pdf [file 1471-2156-10-71-S4.pdf]
